# Supplementary material for: Ultra-small gold nanoclusters assembled on plasma polymer-modified zeolites: a multifunctional nanohybrid with anti-haemorrhagic and anti-inflammatory properties
Source: Royal Society of Chemistry journal article supplement (doi:10.1039/d1nr06591b), 2021-01-01
Supplement: d1nr06591b1.pdf [file d1nr06591b1.pdf]

## Supplementary information

### Ultra-small gold nanoclusters assembled on plasma polymer-modified zeolites: a multifunctional nanohybrid with anti-haemorrhagic and anti-inflammatory properties

Laura E. González García <sup>a,b,#</sup>, Neethu Ninan <sup>a,b,#</sup>, Johanna Simon <sup>c,d</sup>, Rahul Madathiparambil Visalakshan <sup>a</sup>, Richard Bright <sup>a,b</sup>, Satriyo K. Wahono <sup>e</sup>, Kostya Ostrikov <sup>f</sup>, Volker Mailänder <sup>c,d</sup>, Katharina Landfester <sup>c,d</sup>, Nirmal Goswami <sup>a,g,\*</sup>, Krasimir Vasilev <sup>a,b,\*</sup>

<sup>a</sup>Academic Unit of STEM, The University of South Australia, Mawson Lakes, SA 5095, Australia

<sup>b</sup>Future Industries Institute, University of South Australia, Mawson Lakes SA 5095, Australia

<sup>c</sup>Max-Planck-Institute for Polymer Research, Ackermannweg 10, 55128 Mainz, Germany

<sup>d</sup>Dermatology Clinic, University Medical Center of the Johannes Gutenberg-University Mainz, Langenbeckstr. 1, 55131 Mainz, Germany

<sup>e</sup>Research Division for Natural Product Technology, Indonesian Institutes of Sciences, Jl. Jogja-Wonosari km 32, Gading, Playen, Gunungkidul, Yogyakarta 55861, Indonesia.

<sup>f</sup>School of Chemistry and Physics, Centre for Materials Science, Centre for Biomedical Technologies, Queensland University of Technology, Brisbane QLD 4000, Australia.

<sup>g</sup>Materials Chemistry Department, CSIR-Institute of Minerals and Materials Technology, Acharya Vihar, Bhubaneswar-751013, India. Academy of Scientific & Innovative Research (AcSIR), Ghaziabad, 201 002, India

#Equal authorship

\*Corresponding author email address: krasimir.vasilev@unisa.edu.au, ngoswami@immt.res.in

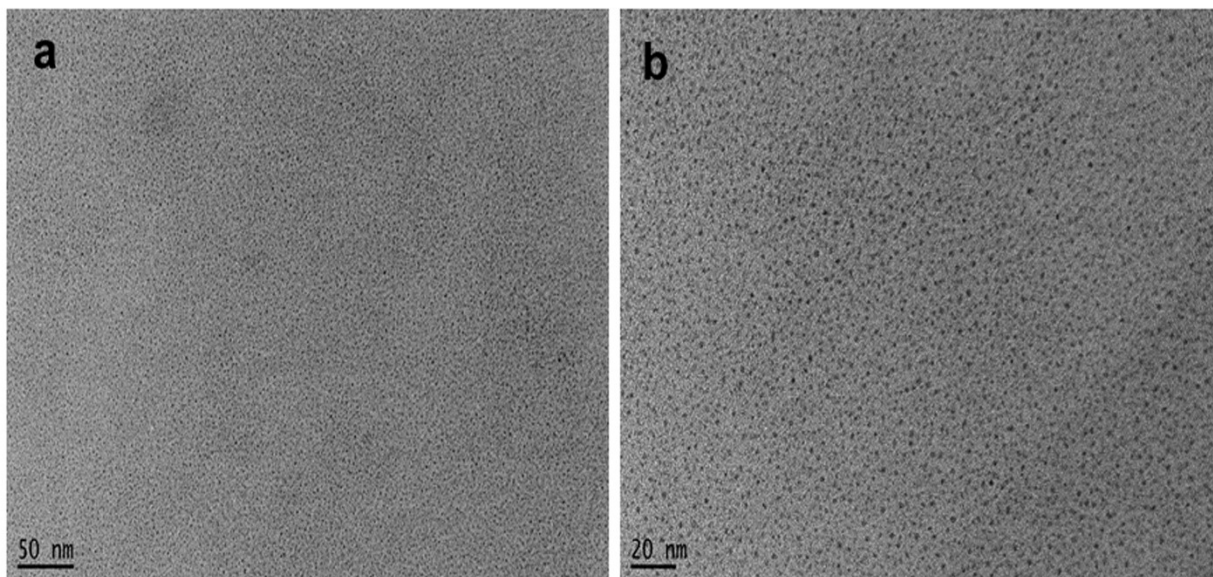

**Fig. S1** TEM micrograph of glutathione protected AuNCs at (a) lower and (b) higher magnification [1].

## References

1. N. Goswami, R. Bright, R. M. Visalakshan, B. Biswas, P. Zilm and K. Vasilev, *Nanoscale Adv.*, 2019, **1**, 2356-2364.
